# Supplementary material for: SCF/c-KIT Signaling Increased Mucin2 Production by Maintaining Atoh1 Expression in Mucinous Colorectal Adenocarcinoma
Source: MDPI journal article supplement (doi:10.3390/ijms19051541), 2018-05-22
Supplement: s1 [file s1]

Table S1. Human CRC samples

| Type                      | All | non-MCA    | MCA             |
|---------------------------|-----|------------|-----------------|
|                           | 24  | 16 (66.7%) | 8 (33.3%)       |
| <b>Gender</b>             |     |            | <i>P</i> =0.022 |
| Male                      | 14  | 12         | 2               |
| Female                    | 10  | 4 (25%)    | 6 (75%)         |
| <b>Tumor location</b>     |     |            | <i>P</i> =0.667 |
| Right                     | 10  | 7 (43.75%) | 5 (52.5%)       |
| Left                      | 14  | 9          | 3               |
| <b>Lymphatic invasion</b> |     |            | <i>P</i> =0.033 |
| No                        | 10  | 10         | 1               |
| Yes                       | 14  | 6 (37.5%)  | 7 (87.5%)       |
| <b>Distant metastasis</b> |     |            | <i>P</i> =0.362 |
| No                        | 17  | 13         | 5               |
| Yes                       | 7   | 3 (18.75%) | 3 (37.5%)       |

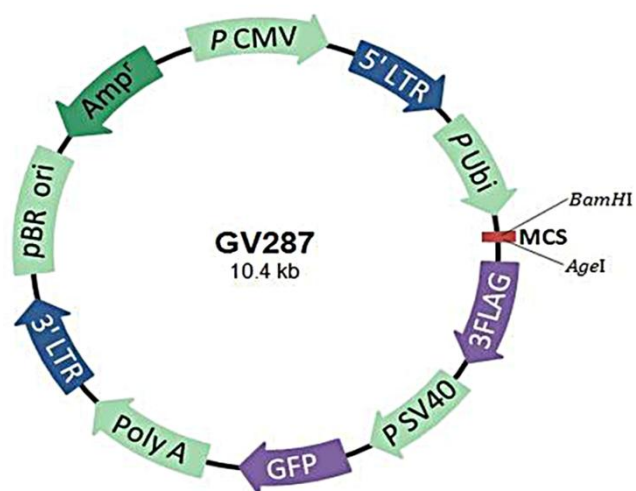

Figure S1. Scheme of lentivirus overexpressing *c-kit*.

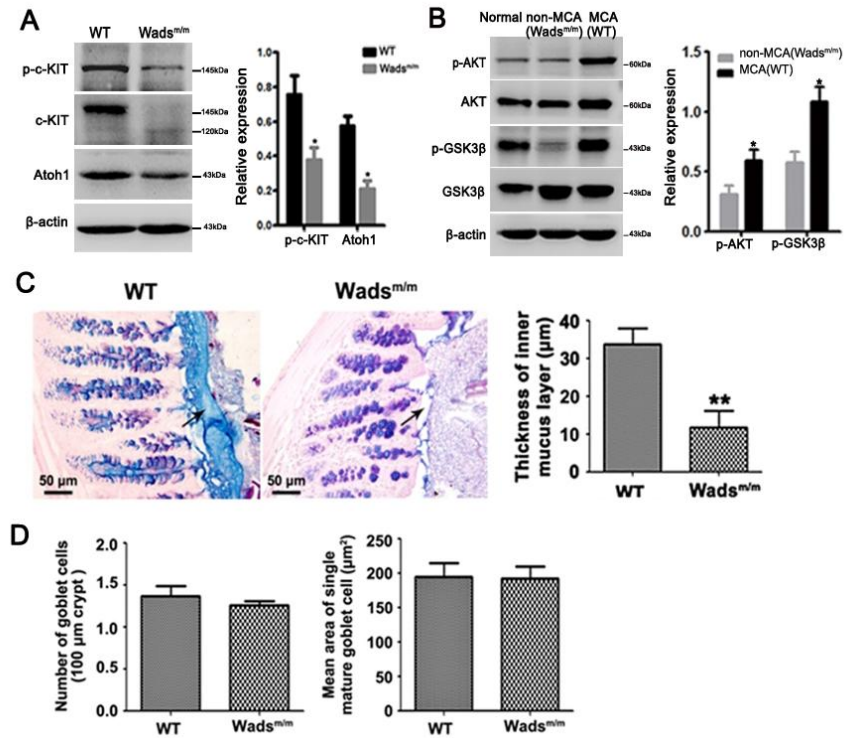

**Figure S2.** (A) The expressions of c-KIT, p-c-KIT and Atoh1 in normal mucosa were stronger in WT mice than those in Wads<sup>m/m</sup> mice,  $*P<0.05$ . (B) Compared with Wads<sup>m/m</sup>-non-MCA tissues, the p-AKT and p-GSK3β were clearly increased in WT-MCA tissues,  $*P<0.05$ . (C) Alcian blue and PAS double staining showing inner mucus layer (arrow) in distal colon of WT and Wads<sup>m/m</sup> mice. The inner mucus layer in WT mice was continuous and densely compacted while it was incomplete and loose in Wads<sup>m/m</sup> mice. Significantly, the inner mucus layer was thinner in Wads<sup>m/m</sup> mice ( $n=5$ ) than that in WT mice ( $n=5$ ),  $**P<0.01$ . (D) There was neither visible difference in goblet cell number between WT ( $n=5$ ) and Wads<sup>m/m</sup> ( $n=5$ ) mice, nor mean area of single goblet cell.
